# Supplementary material for: Effects of Host Plants and Their Infection Status on Acquisition and Inoculation of A Plant Virus by Its Hemipteran Vector
Source: MDPI journal article supplement (doi:10.3390/pathogens12091119), 2023-09-01
Supplement: s1 [file s1]

## S.1 Clip Cage

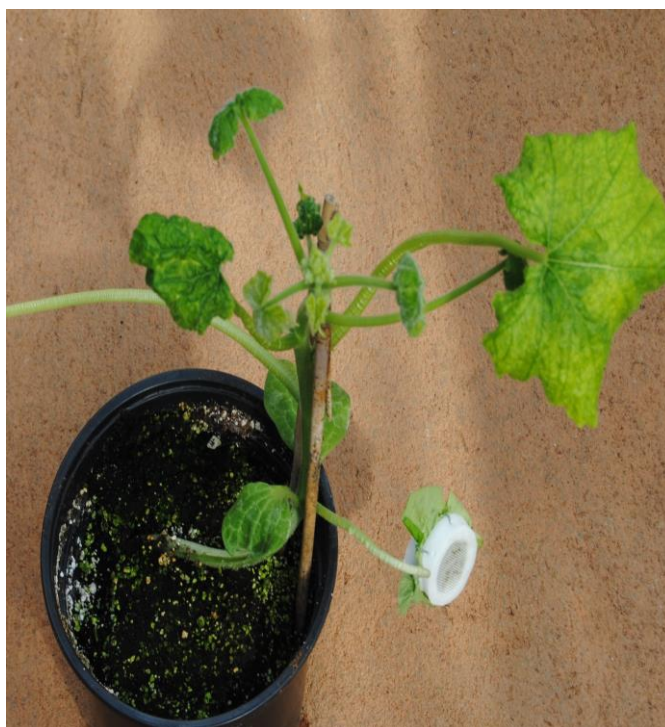

## S.2 Virus accumulation in plants (E1).

| Exp Repeat | Replication | Plant     | Copies per ng DNA |
|------------|-------------|-----------|-------------------|
| 1          | 1           | Snap bean | 4.09E+04          |
| 1          | 2           | Snap bean | 2.73E+04          |
| 1          | 3           | Snap bean | 6.26E+04          |
| 1          | 4           | Snap bean | 4.12E+05          |
| 1          | 5           | Snap bean | 2.76E+05          |
| 1          | 6           | Snap bean | 6.07E+04          |
| 2          | 1           | Snap bean | 1.99E+05          |
| 2          | 2           | Snap bean | 4.10E+05          |
| 2          | 3           | Snap bean | 3.01E+04          |
| 2          | 4           | Snap bean | 1.02E+05          |
| 2          | 5           | Snap bean | 1.76E+05          |
| 2          | 6           | Snap bean | 6.00E+04          |
| 3          | 7           | Snap bean | 8.40E+04          |
| 3          | 1           | Snap bean | 2.31E+05          |
| 3          | 2           | Snap bean | 3.22E+05          |
| 3          | 3           | Snap bean | 4.30E+05          |
| 3          | 4           | Snap bean | 2.03E+05          |
| 3          | 5           | Snap bean | 2.26E+05          |
| 3          | 6           | Snap bean | 5.12E+05          |

|   |   |         |          |
|---|---|---------|----------|
| 1 | 1 | Tobacco | 2.15E+06 |
| 1 | 2 | Tobacco | 9.33E+06 |
| 1 | 3 | Tobacco | 9.27E+06 |
| 1 | 4 | Tobacco | 9.53E+06 |
| 1 | 5 | Tobacco | 8.40E+05 |
| 1 | 6 | Tobacco | 3.17E+06 |
| 1 | 7 | Tobacco | 2.12E+06 |
| 2 | 1 | Tobacco | 2.72E+06 |
| 2 | 2 | Tobacco | 3.29E+06 |
| 2 | 3 | Tobacco | 1.53E+06 |
| 2 | 4 | Tobacco | 3.34E+06 |
| 2 | 5 | Tobacco | 7.55E+05 |
| 2 | 6 | Tobacco | 9.72E+05 |
| 2 | 7 | Tobacco | 8.60E+06 |
| 3 | 1 | Tobacco | 7.10E+06 |
| 3 | 2 | Tobacco | 5.27E+06 |
| 3 | 3 | Tobacco | 7.40E+07 |
| 3 | 4 | Tobacco | 5.82E+06 |
| 3 | 5 | Tobacco | 2.11E+06 |
| 3 | 6 | Tobacco | 1.36E+06 |
| 3 | 7 | Tobacco | 8.40E+06 |
| 3 | 8 | Tobacco | 9.04E+06 |
| 3 | 9 | Tobacco | 6.41E+06 |
| 1 | 1 | Squash  | 4.89E+10 |
| 1 | 2 | Squash  | 5.51E+10 |
| 1 | 3 | Squash  | 1.65E+09 |
| 1 | 4 | Squash  | 4.48E+09 |
| 1 | 5 | Squash  | 5.55E+09 |
| 1 | 6 | Squash  | 1.56E+10 |
| 1 | 7 | Squash  | 3.88E+09 |
| 1 | 8 | Squash  | 3.73E+09 |
| 2 | 1 | Squash  | 1.29E+10 |
| 2 | 2 | Squash  | 1.14E+10 |
| 2 | 3 | Squash  | 5.26E+10 |
| 2 | 4 | Squash  | 2.31E+09 |
| 2 | 5 | Squash  | 1.29E+09 |
| 2 | 6 | Squash  | 1.17E+08 |
| 3 | 7 | Squash  | 3.19E+09 |
| 3 | 1 | Squash  | 1.99E+07 |
| 3 | 2 | Squash  | 5.25E+10 |
| 3 | 3 | Squash  | 8.93E+09 |

|   |   |        |          |
|---|---|--------|----------|
| 3 | 4 | Squash | 1.48E+08 |
| 3 | 5 | Squash | 8.13E+09 |
| 3 | 6 | Squash | 2.30E+09 |
| 3 | 7 | Squash | 2.96E+09 |

### S.3 Virus accumulation in plants (E2).

| Exp Repeat | Replication | Plant               | Copies per ng DNA |
|------------|-------------|---------------------|-------------------|
| 1          | 1           | Squash from Bean    | 7.27E+05          |
| 1          | 2           | Squash from Bean    | 7.57E+05          |
| 1          | 3           | Squash from Bean    | 1.42E+04          |
| 1          | 4           | Squash from Bean    | 1.62E+05          |
| 1          | 5           | Squash from Bean    | 4.49E+03          |
| 1          | 6           | Squash from Bean    | 1.99E+03          |
| 1          | 7           | Squash from Bean    | 2.76E+03          |
| 2          | 1           | Squash from Bean    | 1.54E+03          |
| 2          | 2           | Squash from Bean    | 7.15E+03          |
| 2          | 3           | Squash from Bean    | 6.22E+05          |
| 2          | 4           | Squash from Bean    | 5.55E+05          |
| 2          | 5           | Squash from Bean    | 4.42E+04          |
| 2          | 6           | Squash from Bean    | 2.02E+05          |
| 2          | 7           | Squash from Bean    | 2.49E+03          |
| 2          | 8           | Squash from Bean    | 2.09E+03          |
| 2          | 9           | Squash from Bean    | 2.26E+03          |
| 2          | 10          | Squash from Bean    | 5.14E+03          |
| 3          | 1           | Squash from Bean    | 5.55E+03          |
| 3          | 2           | Squash from Bean    | 5.57E+05          |
| 3          | 3           | Squash from Bean    | 1.42E+04          |
| 3          | 4           | Squash from Bean    | 9.90E+04          |
| 3          | 5           | Squash from Bean    | 4.29E+03          |
| 3          | 6           | Squash from Bean    | 3.99E+03          |
| 3          | 7           | Squash from Bean    | 1.02E+05          |
| 3          | 8           | Squash from Bean    | 1.64E+03          |
| 3          | 9           | Squash from Bean    | 7.74E+03          |
| 1          | 1           | Squash from Tobacco | 8.90E+10          |
| 1          | 2           | Squash from Tobacco | 8.04E+10          |
| 1          | 3           | Squash from Tobacco | 1.25E+11          |
| 1          | 4           | Squash from Tobacco | 9.56E+10          |
| 1          | 5           | Squash from Tobacco | 9.35E+08          |
| 1          | 6           | Squash from Tobacco | 1.11E+11          |
| 2          | 1           | Squash from Tobacco | 1.68E+11          |
| 2          | 2           | Squash from Tobacco | 1.30E+11          |

|   |    |                     |          |
|---|----|---------------------|----------|
| 2 | 3  | Squash from Tobacco | 1.57E+11 |
| 2 | 4  | Squash from Tobacco | 2.20E+10 |
| 2 | 5  | Squash from Tobacco | 6.04E+10 |
| 2 | 6  | Squash from Tobacco | 2.25E+11 |
| 2 | 7  | Squash from Tobacco | 8.66E+10 |
| 2 | 8  | Squash from Tobacco | 2.56E+09 |
| 2 | 9  | Squash from Tobacco | 1.01E+11 |
| 2 | 10 | Squash from Tobacco | 1.48E+11 |
| 3 | 1  | Squash from Tobacco | 2.00E+11 |
| 3 | 2  | Squash from Tobacco | 2.77E+11 |
| 3 | 3  | Squash from Tobacco | 1.30E+11 |
| 3 | 4  | Squash from Tobacco | 1.57E+11 |
| 3 | 5  | Squash from Tobacco | 4.12E+10 |
| 3 | 6  | Squash from Tobacco | 3.04E+10 |
| 3 | 7  | Squash from Tobacco | 1.06E+12 |
| 1 | 1  | Squash from squash  | 5.37E+11 |
| 1 | 1  | Squash from squash  | 8.13E+10 |
| 1 | 2  | Squash from squash  | 8.43E+10 |
| 1 | 3  | Squash from squash  | 1.83E+11 |
| 1 | 4  | Squash from squash  | 2.93E+11 |
| 1 | 5  | Squash from squash  | 2.50E+10 |
| 1 | 6  | Squash from squash  | 5.60E+10 |
| 1 | 7  | Squash from squash  | 5.82E+10 |
| 2 | 1  | Squash from squash  | 2.50E+10 |
| 2 | 2  | Squash from squash  | 1.37E+12 |
| 2 | 3  | Squash from squash  | 6.13E+10 |
| 2 | 4  | Squash from squash  | 2.22E+11 |
| 2 | 5  | Squash from squash  | 5.37E+11 |
| 2 | 6  | Squash from squash  | 8.13E+10 |
| 2 | 7  | Squash from squash  | 8.43E+10 |
| 2 | 8  | Squash from squash  | 1.83E+11 |
| 2 | 9  | Squash from squash  | 2.93E+11 |
| 3 | 1  | Squash from squash  | 1.00E+10 |
| 3 | 2  | Squash from squash  | 4.20E+10 |
| 3 | 3  | Squash from squash  | 4.92E+10 |
| 3 | 4  | Squash from squash  | 5.37E+11 |
| 3 | 5  | Squash from squash  | 8.13E+10 |
| 3 | 6  | Squash from squash  | 8.43E+10 |
| 3 | 7  | Squash from squash  | 1.83E+11 |
| 3 | 8  | Squash from squash  | 2.93E+11 |
| 3 | 9  | Squash from squash  | 2.50E+10 |

|   |    |                    |          |
|---|----|--------------------|----------|
| 3 | 10 | Squash from squash | 5.60E+10 |
|---|----|--------------------|----------|

#### S.4 Virus accumulation in plants (E3).

| Exp Repeat | Replica-<br>tion | Plant* | Copies per ng DNA |
|------------|------------------|--------|-------------------|
| 1          | 1                | SBS    | 26510             |
| 1          | 2                | SBS    | 56000             |
| 1          | 3                | SBS    | 14100             |
| 2          | 1                | SBS    | 42000             |
| 2          | 2                | SBS    | 42940             |
| 3          | 1                | SBS    | 19920             |
| 3          | 2                | SBS    | 14200             |
| 3          | 3                | SBS    | 62000             |
| 3          | 4                | SBS    | 14200             |
| 1          | 1                | STS    | 8.90E+10          |
| 1          | 2                | STS    | 8.04E+10          |
| 1          | 3                | STS    | 1.25E+11          |
| 1          | 4                | STS    | 9.56E+10          |
| 1          | 5                | STS    | 9.35E+11          |
| 1          | 6                | STS    | 8.11E+10          |
| 1          | 7                | STS    | 1.68E+10          |
| 1          | 8                | STS    | 1.30E+10          |
| 2          | 1                | STS    | 5.57E+10          |
| 2          | 2                | STS    | 2.32E+10          |
| 2          | 3                | STS    | 4.32E+10          |
| 2          | 4                | STS    | 5.67E+11          |
| 2          | 5                | STS    | 8.99E+11          |
| 2          | 6                | STS    | 5.67E+10          |
| 2          | 7                | STS    | 9.56E+10          |
| 2          | 8                | STS    | 7.56E+10          |
| 2          | 9                | STS    | 2.03E+11          |
| 3          | 1                | STS    | 4.56E+11          |
| 3          | 2                | STS    | 1.30E+11          |
| 3          | 3                | STS    | 5.70E+11          |
| 3          | 4                | STS    | 5.57E+10          |
| 3          | 5                | STS    | 2.32E+10          |
| 3          | 6                | STS    | 4.32E+10          |
| 3          | 7                | STS    | 5.67E+11          |
| 3          | 8                | STS    | 8.99E+11          |
| 1          | 1                | SMS    | 5.37E+11          |

|   |    |     |          |
|---|----|-----|----------|
| 1 | 2  | SMS | 8.13E+10 |
| 1 | 3  | SMS | 8.43E+10 |
| 1 | 4  | SMS | 3.83E+11 |
| 1 | 5  | SMS | 2.93E+11 |
| 1 | 6  | SMS | 2.50E+11 |
| 1 | 7  | SMS | 5.60E+10 |
| 1 | 8  | SMS | 5.82E+10 |
| 1 | 9  | SMS | 2.50E+10 |
| 1 | 10 | SMS | 8.90E+10 |
| 2 | 1  | SMS | 8.04E+10 |
| 2 | 2  | SMS | 2.51E+11 |
| 2 | 3  | SMS | 7.66E+10 |
| 2 | 4  | SMS | 7.35E+10 |
| 2 | 5  | SMS | 6.54E+11 |
| 2 | 6  | SMS | 3.68E+11 |
| 3 | 1  | SMS | 2.60E+11 |
| 3 | 2  | SMS | 6.34E+11 |
| 3 | 3  | SMS | 4.11E+11 |
| 3 | 4  | SMS | 3.24E+10 |
| 3 | 5  | SMS | 5.60E+10 |
| 3 | 6  | SMS | 5.82E+10 |
| 3 | 7  | SMS | 2.50E+10 |
| 3 | 8  | SMS | 8.90E+10 |

\*

SBS squash infected from squash that was originally infected from snap

bean. STS squash infected from squash that was originally infected from

tobacco.

SMS squash infected from squash that was originally infected from mixed infected squash.
